# Supplementary material for: MoSSe/Hf(Zr)S2 heterostructures used for efficient Z-scheme photocatalytic water-splitting
Source: Royal Society of Chemistry journal article supplement (doi:10.1039/d2cp03764e), 2022-01-01
Supplement: d2cp03764e1.pdf [file d2cp03764e1.pdf]

## Supporting Information

### MoSSe/Hf(Zr)S<sub>2</sub> heterostructures used for efficient Z-scheme photocatalytic water-splitting

Guangzhao Wang,<sup>\*a,b,c</sup> Junli Chang,<sup>d</sup> San-Dong Guo,<sup>e</sup> Weikang Wu,<sup>f</sup> Wenyi Tang,<sup>a</sup> Hao Guo,<sup>g</sup> Suihu Dang,<sup>a</sup>  
Rui Wang,<sup>b</sup> and Yee Sin Ang<sup>h</sup>

<sup>a</sup> *Key Laboratory of Extraordinary Bond Engineering and Advanced Materials Technology of Chongqing, School of Electronic Information Engineering, Yangtze Normal University, Chongqing 408100, China.*

<sup>b</sup> *Institute for Structure and Function & Department of Physics & Chongqing Key Laboratory for Strongly Coupled Physics, Chongqing University, Chongqing 401331, China.*

<sup>c</sup> *Chongqing Jiulongyuan High-tech Industry Group Co., Ltd., Chongqing 400080, China.*

<sup>d</sup> *School of Physical Science and Technology, Southwest University, Chongqing 400715, China.*

<sup>e</sup> *School of Electronic Engineering, Xi'an University of Posts and Telecommunications, Xi'an 710121, China.*

<sup>f</sup> *Division of Physics and Applied Physics, School of Physical and Mathematical Sciences, Nanyang Technological University, Singapore, 637371, Singapore.*

<sup>g</sup> *Research Laboratory for Quantum Materials, Singapore University of Technology and Design, Singapore 487372, Singapore.*

<sup>h</sup> *Science, Mathematics and Technology, Singapore University of Technology and Design, Singapore 487372, Singapore.*

\* Corresponding author. E-mail address: [wangyan6930@126.com](mailto:wangyan6930@126.com)/[wangyan6930@yznu.edu.cn](mailto:wangyan6930@yznu.edu.cn)

**Table S1** Free energy changes for all the reaction steps in the HER process of HfS<sub>2</sub>/SMoSe HS under different conditions.

|                                   | $\Delta G_{H1}$ (eV) | $\Delta G_{H2}$ (eV) |
|-----------------------------------|----------------------|----------------------|
| <i>pH</i> = 0, <i>U</i> = 0 eV    | 1.87                 | -1.87                |
| <i>pH</i> = 7, <i>U</i> = 0 eV    | 2.29                 | -1.46                |
| <i>pH</i> = 0, <i>U</i> = 0.95 eV | 0.92                 | -2.82                |
| <i>pH</i> = 7, <i>U</i> = 0.95 eV | 1.34                 | -2.41                |

**Table S2** Free energy changes for all the reaction steps in the HER process of HfS<sub>2</sub>/SeMoS HS under different conditions.

|                                   | $\Delta G_{H1}$ (eV) | $\Delta G_{H2}$ (eV) |
|-----------------------------------|----------------------|----------------------|
| <i>pH</i> = 0, <i>U</i> = 0 eV    | 1.58                 | -1.58                |
| <i>pH</i> = 7, <i>U</i> = 0 eV    | 2.00                 | -1.17                |
| <i>pH</i> = 0, <i>U</i> = 0.28 eV | 1.30                 | -1.86                |
| <i>pH</i> = 7, <i>U</i> = 0.28 eV | 1.72                 | -1.45                |

**Table S3** Free energy changes for all the reaction steps in the HER process of ZrS<sub>2</sub>/SMoSe HS under different conditions.

|                                   | $\Delta G_{H1}$ (eV) | $\Delta G_{H2}$ (eV) |
|-----------------------------------|----------------------|----------------------|
| <i>pH</i> = 0, <i>U</i> = 0 eV    | 1.87                 | -1.87                |
| <i>pH</i> = 7, <i>U</i> = 0 eV    | 2.28                 | -1.46                |
| <i>pH</i> = 0, <i>U</i> = 1.05 eV | 0.82                 | -2.92                |
| <i>pH</i> = 7, <i>U</i> = 1.05 eV | 1.23                 | -2.51                |

**Table S4** Free energy changes for all the reaction steps in the HER process of ZrS<sub>2</sub>/SeMoS HS under different conditions.

|                                   | $\Delta G_{H1}$ (eV) | $\Delta G_{H2}$ (eV) |
|-----------------------------------|----------------------|----------------------|
| <i>pH</i> = 0, <i>U</i> = 0 eV    | 1.55                 | -1.55                |
| <i>pH</i> = 7, <i>U</i> = 0 eV    | 1.97                 | -1.14                |
| <i>pH</i> = 0, <i>U</i> = 0.25 eV | 1.30                 | -1.80                |
| <i>pH</i> = 7, <i>U</i> = 0.25 eV | 1.72                 | -1.39                |

**Table S5** The free energy changes for all the reaction steps in the OER process of HfS<sub>2</sub>/SMoSe HS under different conditions.

|                                   | $\Delta G_1$ (eV) | $\Delta G_2$ (eV) | $\Delta G_3$ (eV) | $\Delta G_4$ (eV) |
|-----------------------------------|-------------------|-------------------|-------------------|-------------------|
| <i>pH</i> = 0, <i>U</i> = 0 eV    | 2.29              | 0.58              | 2.64              | -0.59             |
| <i>pH</i> = 7, <i>U</i> = 0 eV    | 1.88              | 0.17              | 2.23              | -1.01             |
| <i>pH</i> = 0, <i>U</i> = 2.80 eV | -0.50             | -2.22             | -0.16             | -3.40             |
| <i>pH</i> = 7, <i>U</i> = 2.80 eV | -0.92             | -2.63             | -0.57             | -3.81             |

**Table S6** The free energy changes for all the reaction steps in the OER process of HfS<sub>2</sub>/SeMoS HS under different conditions.

|                                   | $\Delta G_1$ (eV) | $\Delta G_2$ (eV) | $\Delta G_3$ (eV) | $\Delta G_4$ (eV) |
|-----------------------------------|-------------------|-------------------|-------------------|-------------------|
| <i>pH</i> = 0, <i>U</i> = 0 eV    | 2.28              | 0.62              | 2.62              | -0.60             |
| <i>pH</i> = 7, <i>U</i> = 0 eV    | 1.86              | 0.21              | 2.21              | -1.01             |
| <i>pH</i> = 0, <i>U</i> = 2.71 eV | -0.43             | -2.09             | -0.09             | -3.31             |
| <i>pH</i> = 7, <i>U</i> = 2.71 eV | -0.85             | -2.50             | -0.50             | -3.72             |

**Table S7** The free energy changes for all the reaction steps in the OER process of ZrS<sub>2</sub>/SMoSe HS under different conditions.

|                                   | $\Delta G_1$ (eV) | $\Delta G_2$ (eV) | $\Delta G_3$ (eV) | $\Delta G_4$ (eV) |
|-----------------------------------|-------------------|-------------------|-------------------|-------------------|
| <i>pH</i> = 0, <i>U</i> = 0 eV    | 2.13              | 0.61              | 2.65              | -0.47             |
| <i>pH</i> = 7, <i>U</i> = 0 eV    | 1.72              | 0.19              | 2.24              | -0.88             |
| <i>pH</i> = 0, <i>U</i> = 2.67 eV | -0.54             | -2.07             | -0.01             | -3.14             |
| <i>pH</i> = 7, <i>U</i> = 2.67 eV | -0.95             | -2.48             | -0.43             | -3.55             |



**Table S8** The free energy changes for all the reaction steps in the OER process of ZrS<sub>2</sub>/SeMoS HS under different conditions.

|                                   | $\Delta G_1$ (eV) | $\Delta G_2$ (eV) | $\Delta G_3$ (eV) | $\Delta G_4$ (eV) |
|-----------------------------------|-------------------|-------------------|-------------------|-------------------|
| <i>pH</i> = 0, <i>U</i> = 0 eV    | 2.12              | 0.64              | 2.65              | -0.49             |
| <i>pH</i> = 7, <i>U</i> = 0 eV    | 1.71              | 0.23              | 2.23              | -0.90             |
| <i>pH</i> = 0, <i>U</i> = 2.73 eV | -0.61             | -2.09             | -0.08             | -3.22             |
| <i>pH</i> = 7, <i>U</i> = 2.73 eV | -1.02             | -2.50             | -0.50             | -3.63             |

**Table S9** Free energy changes for all the reaction steps in the HER process of Se defected HfS<sub>2</sub>/SMoSe HS under different conditions.

|                                   | $\Delta G_{H1}$ (eV) | $\Delta G_{H2}$ (eV) |
|-----------------------------------|----------------------|----------------------|
| <i>pH</i> = 0, <i>U</i> = 0 eV    | 0.01                 | -0.01                |
| <i>pH</i> = 7, <i>U</i> = 0 eV    | 0.43                 | 0.40                 |
| <i>pH</i> = 0, <i>U</i> = 0.95 eV | -0.94                | -0.96                |
| <i>pH</i> = 7, <i>U</i> = 0.95 eV | -0.52                | -0.55                |

**Table S10** Free energy changes for all the reaction steps in the HER process of S defected HfS<sub>2</sub>/SeMoS HS under different conditions.

|                       | $\Delta G_{H1}$ (eV) | $\Delta G_{H2}$ (eV) |
|-----------------------|----------------------|----------------------|
| $pH = 0, U = 0$ eV    | -0.30                | 0.30                 |
| $pH = 7, U = 0$ eV    | 0.11                 | 0.72                 |
| $pH = 0, U = 0.28$ eV | -0.58                | 0.02                 |
| $pH = 7, U = 0.28$ eV | -0.17                | 0.44                 |

**Table S11** Free energy changes for all the reaction steps in the HER process of Se defected ZrS<sub>2</sub>/SMoSe HS under different conditions.

|                       | $\Delta G_{H1}$ (eV) | $\Delta G_{H2}$ (eV) |
|-----------------------|----------------------|----------------------|
| $pH = 0, U = 0$ eV    | -0.01                | 0.01                 |
| $pH = 7, U = 0$ eV    | 0.40                 | 0.43                 |
| $pH = 0, U = 1.05$ eV | -1.06                | -1.04                |
| $pH = 7, U = 1.05$ eV | -0.65                | -0.62                |

**Table S12** Free energy changes for all the reaction steps in the HER process of S defected ZrS<sub>2</sub>/SeMoS HS under different conditions.

|                       | $\Delta G_{H1}$ (eV) | $\Delta G_{H2}$ (eV) |
|-----------------------|----------------------|----------------------|
| $pH = 0, U = 0$ eV    | -0.40                | 0.40                 |
| $pH = 7, U = 0$ eV    | 0.01                 | 0.82                 |
| $pH = 0, U = 1.05$ eV | -0.65                | 0.15                 |
| $pH = 7, U = 1.05$ eV | -0.24                | 0.57                 |

**Table S13** Values used for the entropy and zero-point energy (ZPE) corrections in determining the free energy of reactants, products, and intermediate species adsorbed on catalysts.

| system                              | $T \times S$ (eV) | ZPE (eV) |
|-------------------------------------|-------------------|----------|
| HfS <sub>2</sub> /SMoSe@H           | 0.02              | 0.15     |
| HfS <sub>2</sub> /SMoSe@O           | 0.08              | 0.07     |
| HfS <sub>2</sub> /SMoSe@OH          | 0.12              | 0.35     |
| HfS <sub>2</sub> /SMoSe@OOH         | 0.18              | 0.42     |
| HfS <sub>2</sub> /SeMoS@H           | 0.02              | 0.18     |
| HfS <sub>2</sub> /SeMoS@O           | 0.08              | 0.06     |
| HfS <sub>2</sub> /SeMoS@OH          | 0.10              | 0.34     |
| HfS <sub>2</sub> /SeMoS@OOH         | 0.20              | 0.44     |
| ZrS <sub>2</sub> /SMoSe@H           | 0.02              | 0.15     |
| ZrS <sub>2</sub> /SMoSe@O           | 0.09              | 0.06     |
| ZrS <sub>2</sub> /SMoSe@OH          | 0.09              | 0.34     |
| ZrS <sub>2</sub> /SMoSe@OOH         | 0.16              | 0.43     |
| ZrS <sub>2</sub> /SeMoS@H           | 0.02              | 0.19     |
| ZrS <sub>2</sub> /SeMoS@O           | 0.09              | 0.06     |
| ZrS <sub>2</sub> /SeMoS@OH          | 0.12              | 0.35     |
| ZrS <sub>2</sub> /SeMoS@OOH         | 0.11              | 0.42     |
| Defective HfS <sub>2</sub> /SMoSe@H | 0.01              | 0.16     |
| Defective HfS <sub>2</sub> /SeMoS@H | 0.01              | 0.16     |
| Defective ZrS <sub>2</sub> /SMoSe@H | 0.01              | 0.16     |
| Defective ZrS <sub>2</sub> /SeMoS@H | 0.01              | 0.16     |

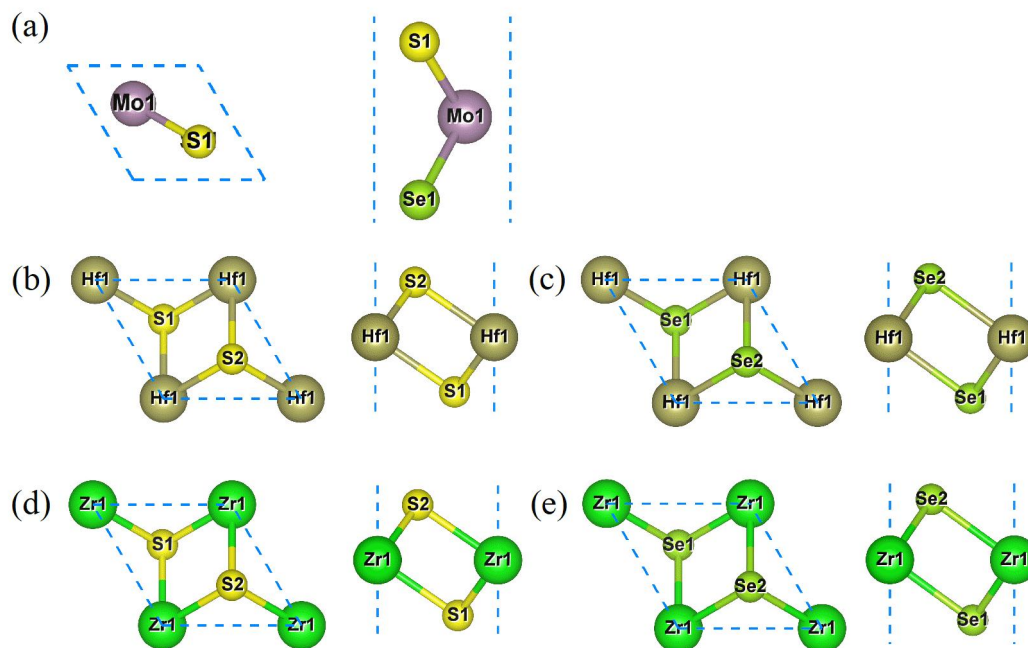

**Fig. S1** Top and side views of the unit cells of (a) MoSSe, (b) HfS<sub>2</sub>, (c) HfSe<sub>2</sub>, (d) ZrS<sub>2</sub>, and (e) ZrSe<sub>2</sub> SLs.

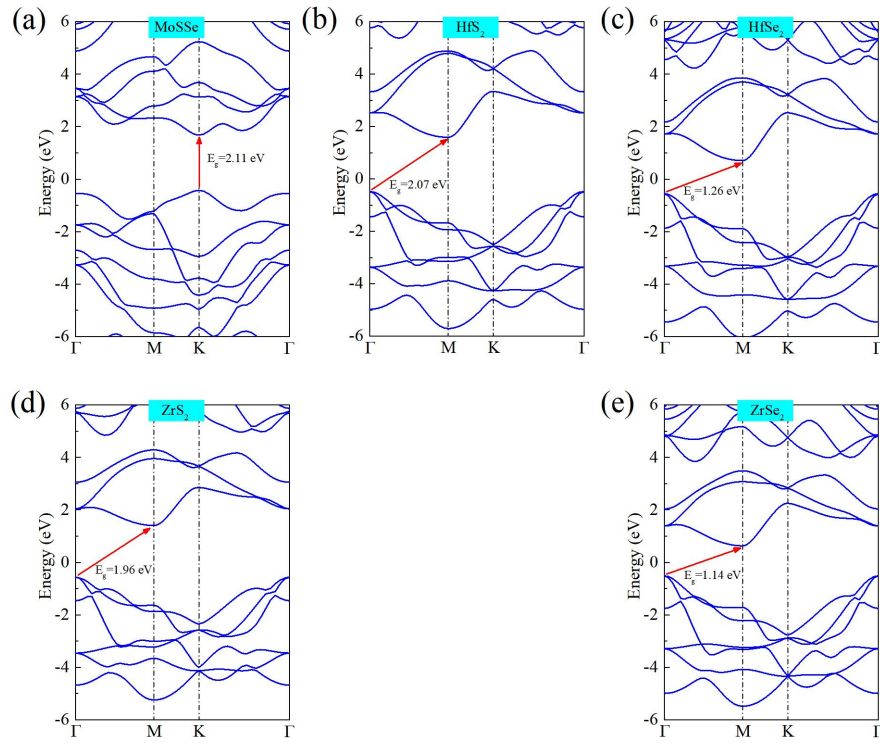

**Fig. S2** Band structures of (a) MoSSe, (b) HfS<sub>2</sub>, (c) HfSe<sub>2</sub>, (d) ZrS<sub>2</sub>, and (e) ZrSe<sub>2</sub> SLs.



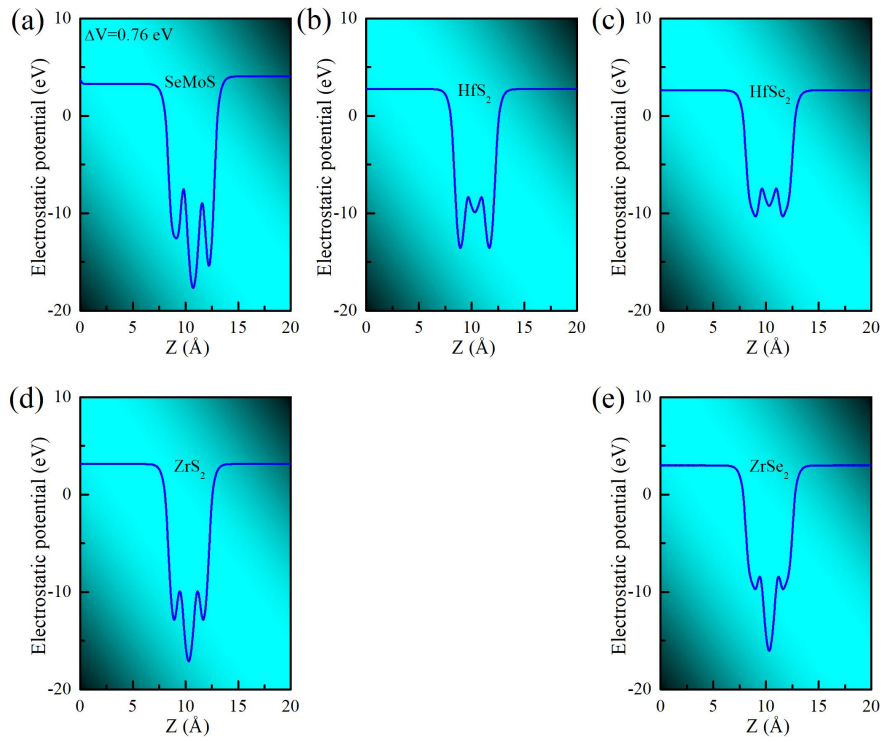

**Fig. S3** Plane-averaged electrostatic potentials of (a) MoSSe, (b) HfS<sub>2</sub>, (c) HfSe<sub>2</sub>, (d) ZrS<sub>2</sub>, and (e) ZrSe<sub>2</sub> SLs.

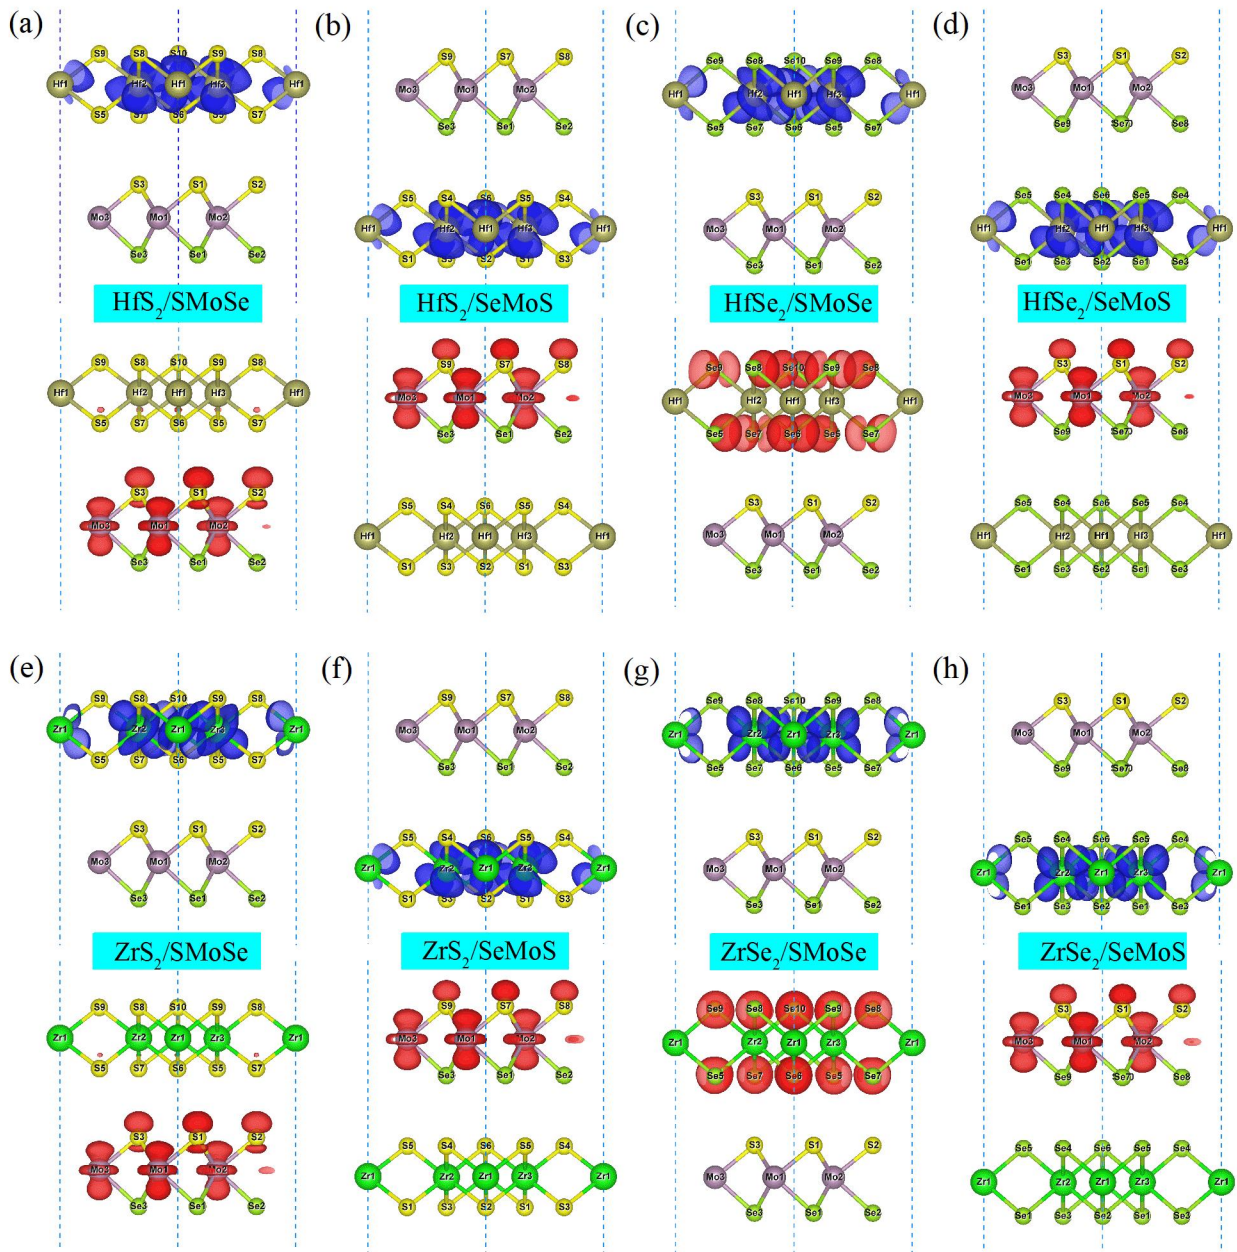

**Fig. S4** The band-decomposed charge densities of the CBM and VBM for (a)  $\text{HfS}_2/\text{SMoSe}$ , (b)  $\text{HfS}_2/\text{SeMoS}$ , (c)  $\text{HfSe}_2/\text{SMoSe}$ , (d)  $\text{HfSe}_2/\text{SeMoS}$ , (e)  $\text{ZrS}_2/\text{SMoSe}$ , (f)  $\text{ZrS}_2/\text{SeMoS}$ , (g)  $\text{ZrSe}_2/\text{SMoSe}$ , and (h)  $\text{ZrSe}_2/\text{SeMoS}$  HSs. The blue and red regions represent the CBM and VBM, respectively.

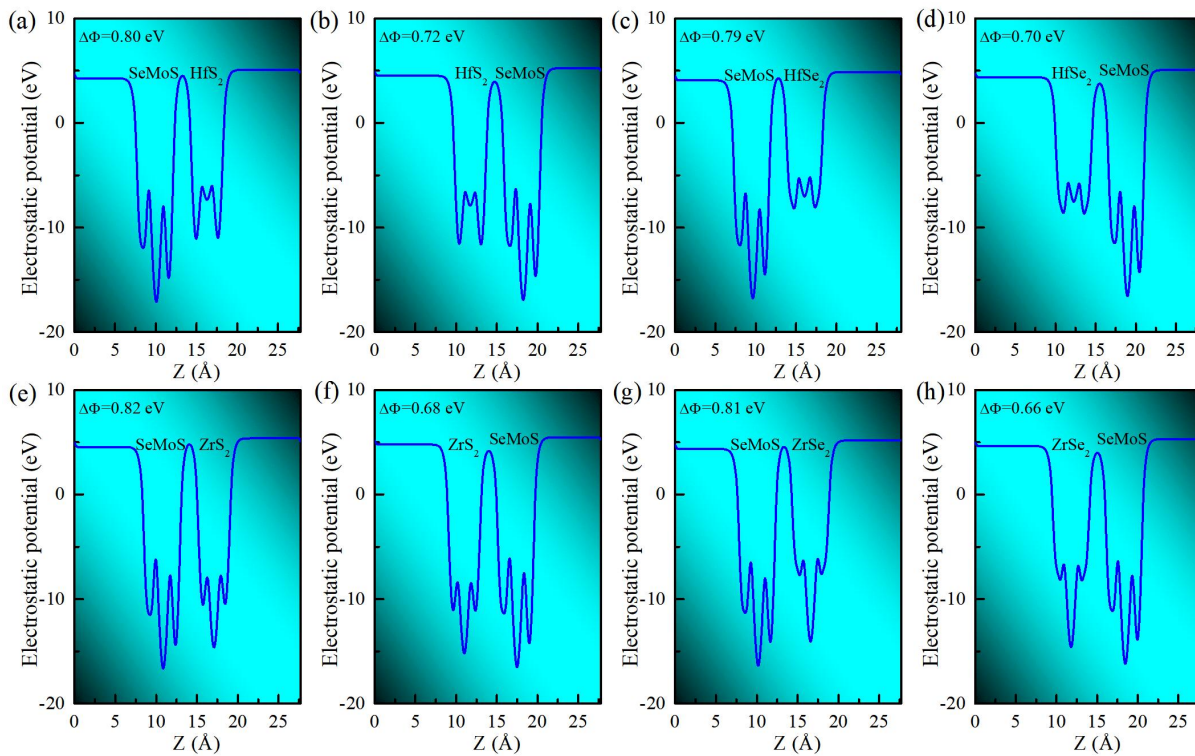

**Fig. S5** Plane-averaged electrostatic potentials of (a) HfS<sub>2</sub>/SMoSe, (b) HfS<sub>2</sub>/SeMoS, (c) HfSe<sub>2</sub>/SMoSe, (d) HfSe<sub>2</sub>/SeMoS, (e) ZrS<sub>2</sub>/SMoSe, (f) ZrS<sub>2</sub>/SeMoS, (g) ZrSe<sub>2</sub>/SMoSe, and (h) ZrSe<sub>2</sub>/SeMoS HSs.

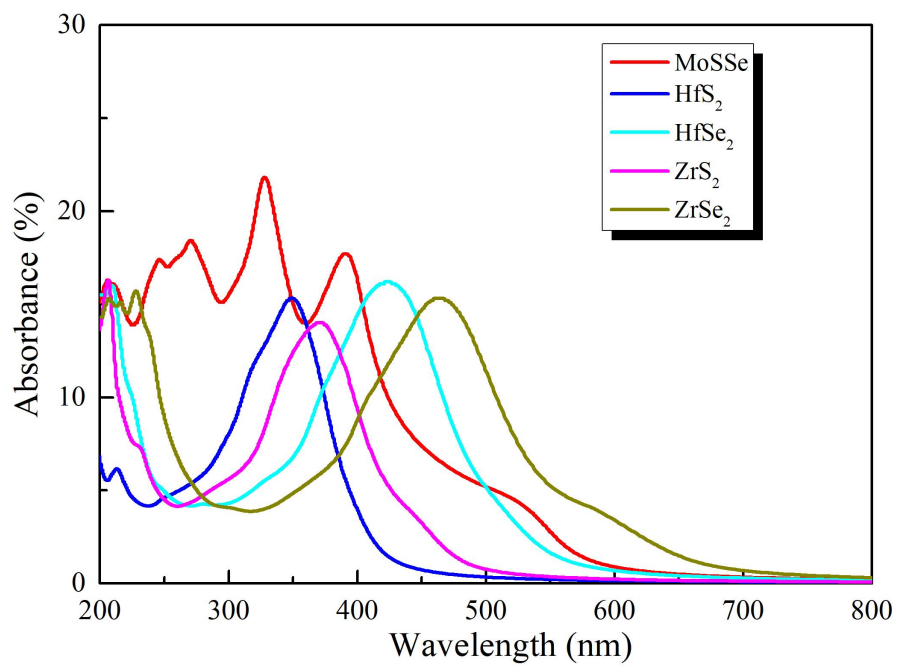

**Fig. S6** The optical curves of MoSSe, HfS<sub>2</sub>, HfSe<sub>2</sub>, ZrS<sub>2</sub>, and ZrSe<sub>2</sub> SLs.

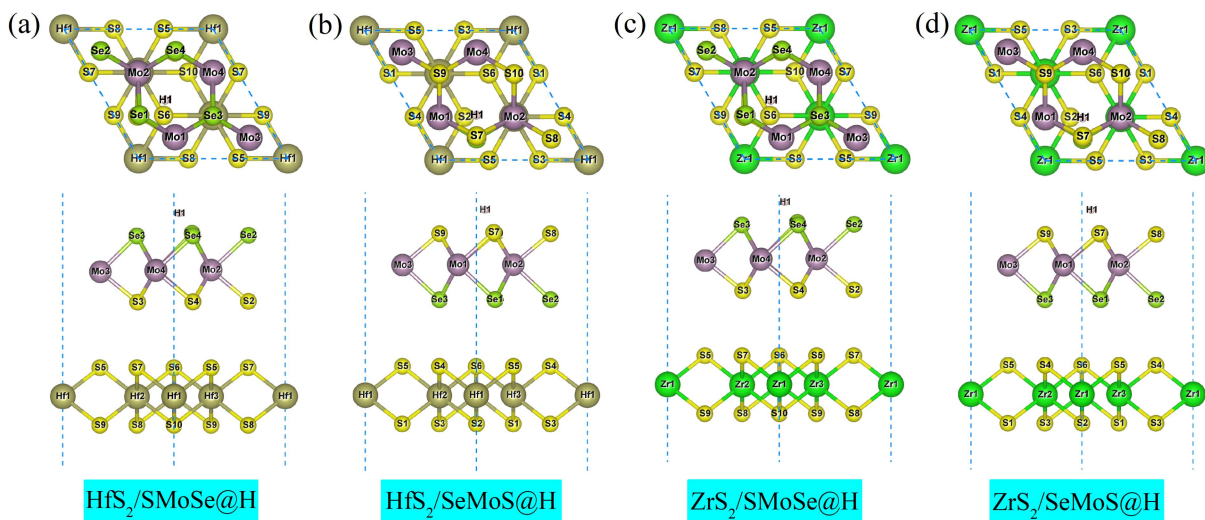

**Fig. S7** Top and side views of optimized geometries of (a)  $\text{HfS}_2/\text{SMoSe}@H$ , (b)  $\text{HfS}_2/\text{SeMoS}@H$ , (c)  $\text{ZrS}_2/\text{SMoSe}@H$ , and (d)  $\text{ZrS}_2/\text{SeMoS}@H$ .

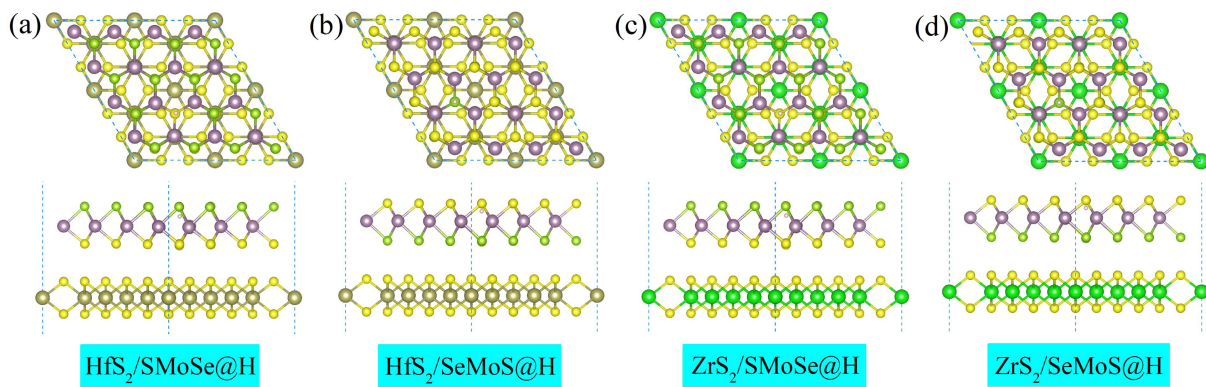

**Fig. S8** Top and side views of optimized geometries of (a)  $\text{HfS}_2/\text{SMoSe}@H$ , (b)  $\text{HfS}_2/\text{SeMoS}@H$ , (c)  $\text{ZrS}_2/\text{SMoSe}@H$ , and (d)  $\text{ZrS}_2/\text{SeMoS}@H$  with one Se (or S) atom vacancy.

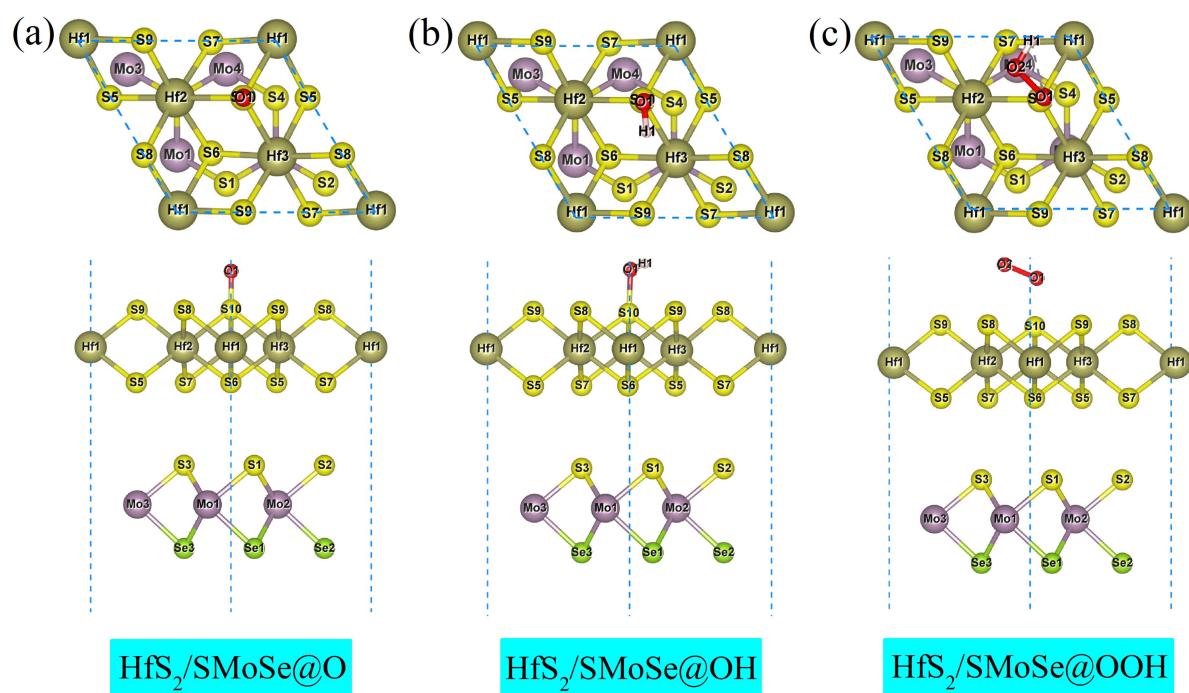

**Fig. S9** Top and side views of optimized geometries of (a)  $\text{HfS}_2/\text{SMoSe}@O$ , (b)  $\text{HfS}_2/\text{SMoSe}@OH$ , and (c)  $\text{HfS}_2/\text{SMoSe}@OOH$ .

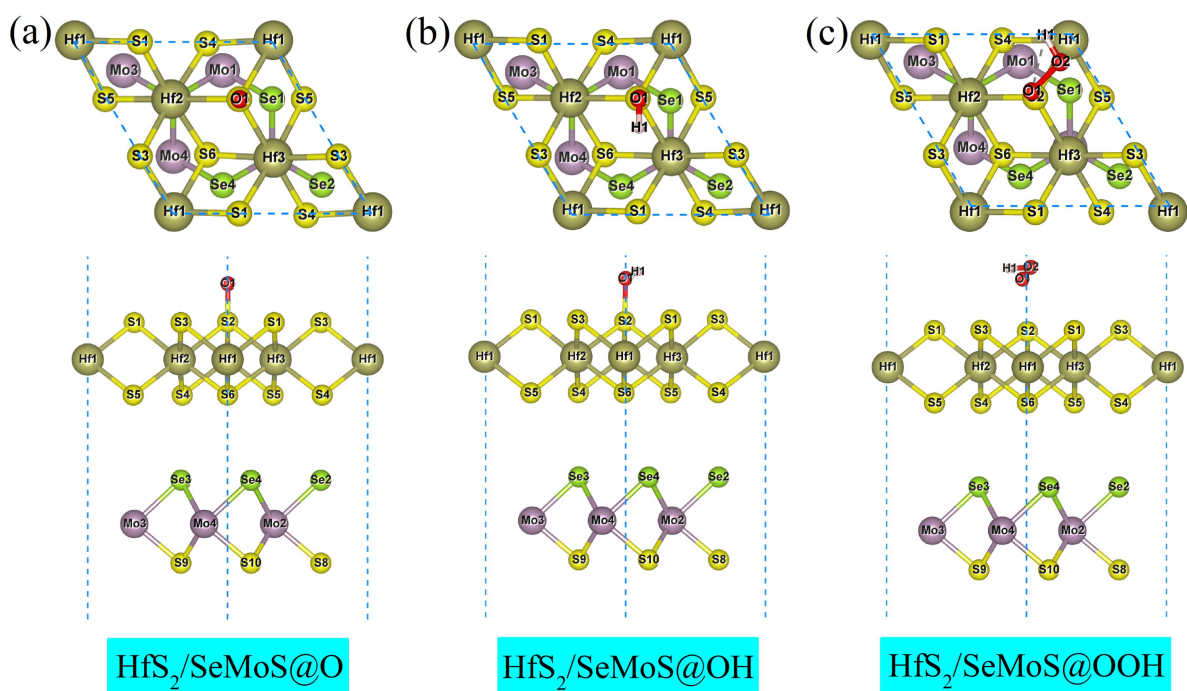

**Fig. S10** Top and side views of optimized geometries of (a)  $\text{HfS}_2/\text{SeMoS}@O$ , (b)  $\text{HfS}_2/\text{SeMoS}@OH$ , and (c)  $\text{HfS}_2/\text{SeMoS}@OOH$ .



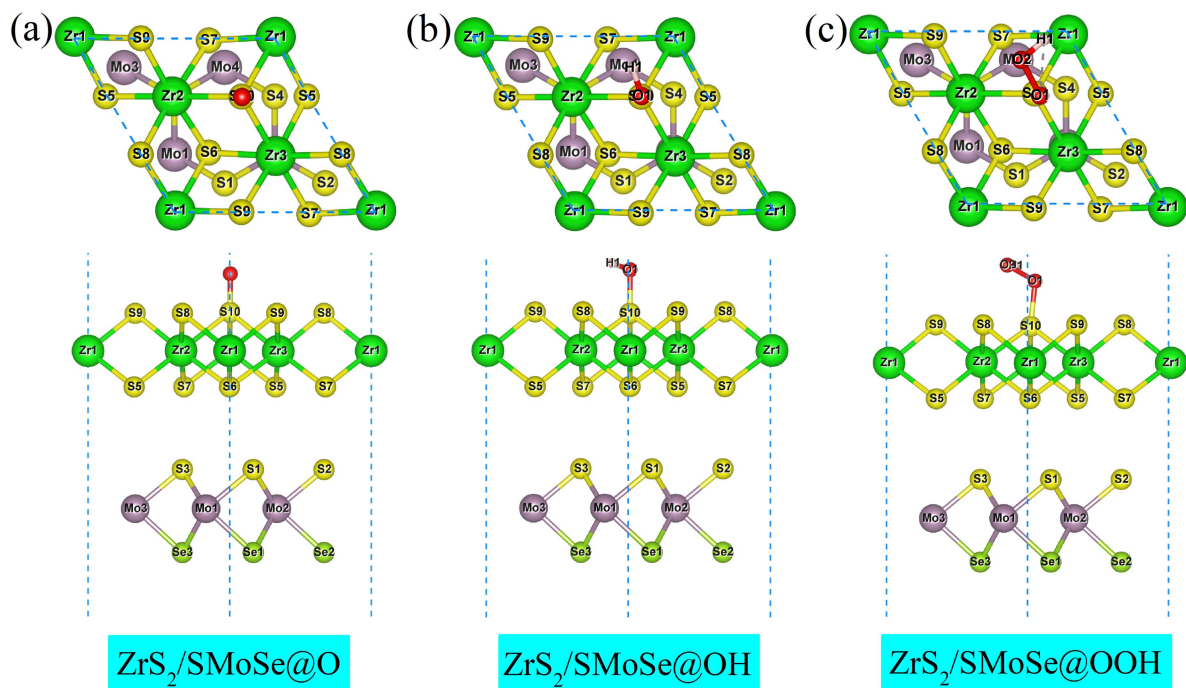

**Fig. S11** Top and side views of optimized geometries of (a)  $\text{ZrS}_2/\text{SMoSe}@O$ , (b)  $\text{ZrS}_2/\text{SMoSe}@OH$ , and (c)  $\text{ZrS}_2/\text{SMoSe}@OOH$ .

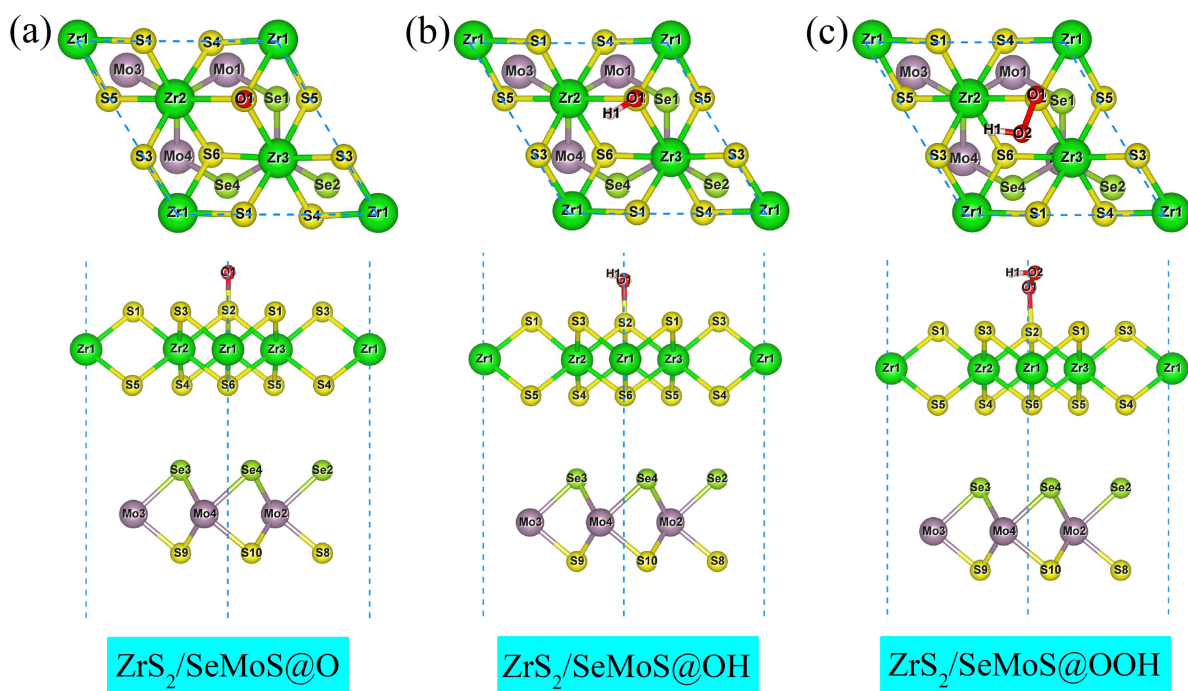

**Fig. S12** Top and side views of optimized geometries of (a)  $\text{ZrS}_2/\text{SeMoS}@O$ , (b)  $\text{ZrS}_2/\text{SeMoS}@OH$ , and (c)  $\text{ZrS}_2/\text{SeMoS}@OOH$ .
